# Supplementary material for: P2X7 promotes the progression of MLL-AF9-induced acute myeloid leukemia by upregulation of Pbx3
Source: PubMed Central journal article supplement — Haematologica. 2020 Mar 12;106(5):1278–89. doi: 10.3324/haematol.2019.243360 (PMC8094107; doi:10.3324/haematol.2019.243360), 2020-03-12
Supplement: 2019_243360-DisclosuresContributions.pdf [file 2019_243360-DisclosuresContributions.pdf]

Haematologica  
HAEMATOL/2019/243360  
Version 3

P2X7 promotes the progression of MLL-AF9 induced acute myeloid  
leukemia by upregulation of Pbx3

Wenli Feng, Xiao Yang, Lina Wang, Rong Wang, Feifei Yang, Hao  
Wang, Xiaoli Liu, Qian Ren, Yingchi Zhang, Xiaofan Zhu, and  
Guoguang Zheng

Disclosures: none

Contributions: W.F. and X.Y. designed the experiments, performed research and drafted the paper. W.F. and X.Y. contributed equally to this work. R.W., F.Y., H.W., X.L. and R.Q. performed research and critically revised the paper. L.W., Y.Z. and X.Z. performed data analysis and critically revised the paper. G.Z. obtained funding, designed the experiments, acquired and analyzed the data, critically revised the paper. All authors are responsible for the accuracy and integrity of all aspects of the manuscript.
