# Supplementary material for: P2X7 promotes the progression of MLL-AF9-induced acute myeloid leukemia by upregulation of Pbx3
Source: PubMed Central journal article supplement — Haematologica. 2020 Mar 12;106(5):1278–89. doi: 10.3324/haematol.2019.243360 (PMC8094107; doi:10.3324/haematol.2019.243360), 2020-03-12
Supplement: 2019_243360_FENG_SUPPL.pdf [file 2019_243360_FENG_SUPPL.pdf]

## **P2X7 promotes the progression of *MLL-AF9*-induced acute myeloid leukemia by upregulation of Pbx3**

**Wenli Feng,<sup>#</sup> Xiao Yang,<sup>#</sup> Lina Wang, Rong Wang, Feifei Yang, Hao Wang, Xiaoli Liu, Qian Ren, Yingchi Zhang, Xiaofan Zhu and Guoguang Zheng**

State Key Laboratory of Experimental Hematology, National Clinical Research Center for Blood Diseases, Institute of Hematology & Blood Diseases Hospital, Chinese Academy of Medical Sciences & Peking Union Medical College, Tianjin, China

*<sup>#</sup>WF and XY contributed equally as co-first authors.*

©2021 Ferrata Storti Foundation. This is an open-access paper. doi:10.3324/haematol.2019.243360

Received: November 19, 2019.

Accepted: March 6, 2020.

Pre-published: March 12, 2020.

Correspondence: *GUOGUANG ZHENG* - zhenggtjchn@aliyun.com

---

## **Supplementary Appendix**

### **Methods**

#### **Gene expression datasets**

Gene expression datasets of patients with hematopoietic malignancies were downloaded from NCBI GEO DataSets (GSE13204, GSE19577, GSE12417, and GSE10358) and the Cancer Genome Atlas (TCGA).

#### **Antibodies**

The antibodies against mouse c-Kit (PE-Cy7-conjugated, 2B8), CD11b (PerCp-Cy5.5-conjugated, M1/70), Gr-1 (PE-Cy7-conjugated, RB6-8C5), CD3 (PerCp-Cy5.5-conjugated, 17A2), B220 (APC-conjugated, RA3-6B2), F4/80 (APC-conjugated, BM8), CD115 (PE-conjugated, AFS98), Ki67 (PE-conjugated, 16A8), BrdU (APC-conjugated, Bu20a), Annexin V (Alexa Fluor<sup>®</sup>647), CD45.1 (APC-Cy7-conjugated, A20) and anti-rabbit IgG (Dylight<sup>™</sup> 649-conjugated, Poly4053) were purchased from BioLegend. Monoclonal antibody against GAPDH (14C10, #2118) was from Cell Signaling Technology. Polyclonal antibodies against PBX3 were from proteintech (12571-1-AP). Polyclonal antibodies against P2X7 were from Alomone Labs (#APR-004) and Abcam (ab94717). The former was for western blot and the latter was for immunofluorescence.

#### **Mice**

C57BL/6J, C57B6.SJL congenic mice and nude mice were provided by the Animal Center of the Institute of Hematology and Blood Diseases Hospital, CAMS & PUMC. Female mice (6 to 8 weeks old, 18-20 g) were used and maintained in SPF-certified facility. Mice were randomly assigned to experimental groups.

## Vectors

The retroviral vector for overexpressing P2X7 was constructed following standard protocols. Briefly, the blank retrovirus vector pMSCV-PGK-BFP was reconstructed from pMSCV-PGK-GFP, and the recombinant vector pMSCV-P2X7-PGK-BFP (pMSCV-P2X7) was constructed by insertion of P2X7 cDNA.

Validated small hairpin RNA (shRNA) sequences targeting P2X7 (P2X7sh1 and P2X7sh2), human Pbx3 (hPbx3sh1, hPbx3sh2) and mouse Pbx3 (mPbx3sh1) in knockdown (KD) experiments were obtained from Sigma-Aldrich. The shRNA sequences are listed below. Scramble (pLV-SC) and KD (pLV-P2X7sh1/sh2 for P2X7, pLV-hPbx3sh1/sh2 for human Pbx3 and pLV-mPbx3sh1 for mouse Pbx3) lentiviruses were constructed using the pLV-H1-EF1 $\alpha$ -red vector following standard protocols.

| Targets  | Sequences                                                      |
|----------|----------------------------------------------------------------|
| P2X7sh1  | 5'-AAAAGCATGAATTATGGCACCATTATTGGATCCAATAATGGTGCCATAATTCATGC-3' |
| P2X7sh2  | 5'-AAAACGGAATAATGGGCATTGAGATTTGGATCCAAATCTCAATGCCCATTTCCG-3'   |
| hPbx3sh1 | 5'-AAAAACTCGGATACCTCTAACTAATTTGGATCCAAATTAGTTAGAGGTATCCGAGT-3' |
| hPbx3sh2 | 5'-AAAAGGTTCTTCAGATACTCTATTTGGATCCAAAATAGAGTTATCTGAAGAACC-3'   |
| mPbx3sh1 | 5'-AAAACGTGTGAAGCAGTTATGATTTTTGGATCCAAAATCATAACTGCTTCACACG-3'  |

## Verification of mouse AML models

The expression of P2X7 was verified by qRT-PCR, western blot and immunofluorescence as previously described.<sup>1</sup> The expression of Pbx3 was detected by qRT-PCR and western blot. P2X7 activity was assessed by measuring the intracellular free Ca<sup>2+</sup> concentration upon BzATP stimulation.<sup>2</sup>

## Human leukemia cells

THP1, HL60 and Kasumi cell lines were obtained from American Type Culture Collection (Manassas, VA). THP1 cells carry t(9;11)(q23;p22) MLL-MLLT3 (MLL-AF9) translocation.

THP1, HL60 or Kasumi cells were infected with blank or pMSCV-P2X7 retrovirus and sorted twice by flow cytometry. The GFP<sup>+</sup> stable transfected cell lines were named THP1-control, THP1-P2X7, HL60-control, HL60-P2X7, Kasumi-control and Kasumi-P2X7, respectively.

P2X7- or Pbx3-knockdown THP1 cells were established. Briefly, THP1 cells were infected with pLV-SC or the knockdown lentiviruses. After sorting by flow cytometry, the stable transfected cell lines were named THP1-SC, THP1-P2X7sh1, THP1-P2X7sh2, THP1-hPbx3sh1 and THP1-hPbx3sh2, respectively.

The xenotransplantation model in NOD/SCID mice with primary cells from an AML patient with *MLL* translocation and high levels of P2X7 expression were established. Mice were sacrificed when BM human leukemia cells exceeded 50%, and leukemia cells were sorted by flow cytometry. Pbx3-knockdown human leukemia cells were established as described above, and the stable transfected cells were named hMLL-SC, hMLL-hPbx3sh1, respectively.

All cells were cultured in RPMI-1640 supplemented with 10% fetal bovine serum (Gibco) and antibiotics (Hyclone) in a humidified atmosphere of 5% CO<sub>2</sub> at 37°C.

### **Cell proliferation and apoptosis assay**

For the BrdU incorporation assay, mice in the middle stage of leukemia (on approximately days 15) were intraperitoneally (*i.p.*) injected with 200  $\mu$ l BrdU (10 mg/ml). Mice were sacrificed 16 hrs later. BM cells were harvested and further stained with BD Pharmingen™ APC BrdU Flow Kit (BD, San Jose, CA) according to the manufacturer's protocols. For the Ki67 staining assay, 2 $\times$ 10<sup>6</sup> GFP<sup>+</sup>BFP<sup>+</sup> cells were fixed and permeabilized following the instructions of Cytofix/Cytoperm™

Fixation/Permeabilization Solution Kit (BD). After that, cells were stained with PE-conjugated anti-Ki67 and Hoechst 33342 before flow cytometry analysis.

Single cell suspension was prepared. Cells were first incubated with Annexin V-Alexa Fluor 647 antibody in 1 × binding buffer for 15 mins. Just before flow cytometry analysis, PI in 1 × binding buffer was added.

### **Cell viability assay**

MTS assay was used for cell viability analysis. THP1 cells and stably transfected cells, *i.e.* THP1-control, THP1-P2X7, THP1-SC, THP1-P2X7sh1, THP1-P2X7sh2, THP1-hPbx3sh1 and THP1-hPbx3sh2, were seeded onto 96-well plates at the concentration of  $3 \times 10^4$  cells/well and cultured for 4 hrs (designated as starting point, or 0 h point). Then cells were cultured for extended periods and MTS (20  $\mu$ l/well) was added to culture systems 2 hrs prior to measurement of absorbance at 490 nm every 24 hrs. Cell viability was calculated as fold change of absorbance verses 0 hr.

### **Colony forming assay**

Sorted GFP<sup>+</sup>BFP<sup>+</sup> (500 cells/well) or GFP<sup>+</sup>BFP<sup>+</sup>RFP<sup>+</sup> (500 cells/well) leukemia cells were plated onto 24-well plates in triplicate in 500  $\mu$ l MethoCult GF M3434 media (Stem Cell Technologies) following the manufacturer's instructions. After 10 days, the total number of colonies was counted. Colonies were stained with 0.05% crystal violet solution for 30 mins, rinsed 5-10 times with PBS and scanned by a scanner.

### **Ara-C treatment**

Mice were transplanted with MA9 or MA9-P2X7 cells to establish AML models, and PB leukemia cells were monitored. Intravenous administration of 500 mg/kg/day Ara-C was performed. In single-dose administration experiments, mice were treated

when the percentage of PB leukemia cells was approximately 4% in both groups. The percentage of PB leukemia cells and the apoptotic rate of BM leukemia cells was determined 24 hrs later. In multiple-dose administration experiments, mice were treated 4 times (every 24 hrs) when the percentage of PB leukemia cells was approximately 8% in both groups. The percentage of PB leukemia cells was monitored every 48 hrs, and the apoptotic rate of BM leukemia cells at 96 hrs was detected. In relapse experiments, mice were treated with Ara-C or PBS twice (days 12 and 13). The percentage of PB leukemia cells was monitored before (days 6 and 11) and after (days 14 and 19) Ara-C treatment. The survival of the mice was recorded.

### **THP1 xenograft mouse models**

Nude mice were irradiated with 250 cGy, and  $1.8 \times 10^7$  THP1 cells in 250  $\mu$ l were subcutaneously inoculated in the right forelimbs. Mice were randomly divided into PBS and A740003 (P2X7 inhibitor) groups. After 10 days, tumors were palpable and measured with a manual caliber every two days. Tumor volume was calculated by the following equation: volume = (length  $\times$  width  $\times$  width/2). From days 12, intratumoral injection of 20  $\mu$ l sterile PBS or 40  $\mu$ M A740003 (Tocris Bioscience) was performed every two days. Mice were sacrificed on days 23, and the tumors were weighed.

### **Quantitative real-time polymerase chain reaction (qRT-PCR)**

Total RNA was extracted using TRIzol reagent (Life Technologies, USA) and reverse transcribed using the Super Script First-Strand Synthesis System for RT-PCR (Invitrogen, Carlsbad, CA) following the manufacturers' protocols. qRT-PCR was conducted on Stepone Plus or 7900 system (Applied Biosystems, Life Technologies) using SYBR Green PCR Master Mix. The expression level of target genes was analyzed by the relative quantity (RQ) value ( $2^{-\Delta\Delta Ct}$ ) calculated using the  $\Delta\Delta Ct$  method [ $\Delta\Delta Ct = (Ct_{TARGET} - Ct_{GAPDH})_{sample} - (Ct_{TARGET} - Ct_{GAPDH})_{calibrator}$ ]. For each gene, the RQ value of control group was designated as 1.00.

## **Western blot**

Standard protocols were followed for sample preparation and experimental procedure. Briefly, GFP<sup>+</sup>BFP<sup>+</sup> leukemia cells were sorted and lysed by sonication for ten cycles in lysis buffer containing RIRP and PMSF. BCA Protein Assay Kit (Thermo Scientific) was used for determination of protein concentration in supernatant. 10% SDS-polyacrylamide gel electrophoresis was undergone to separate proteins. Rabbit polyclonal antibodies against P2X7 and PBX3 or monoclonal GAPDH were used as primary antibodies and goat-anti-rabbit-HRP polyclonal antibodies were used as secondary antibodies. ImageQuant LAS-4010 (GE) was used for chemiluminescent visualization of proteins. Results were quantified by grey value analysis (Image J).

## **Flow cytometry analysis and cell sorting**

BD Canto II or LSR II was used for FACS analysis and Aria III flow cytometer (BD Biosciences) was used for cell sorting, respectively. Standard protocols were followed for all experiments. Data analysis was carried out using FACS Diva (BD Biosciences) or FlowJo 7.6.1 (Tree Star) software.

## References

1. Feng W, Yang F, Wang R, et al. High level P2X7-mediated signaling impairs function of hematopoietic stem/progenitor cells. *Stem Cell Rev.* 2016;12(3):305-314.
2. Chong JH, Zheng GG, Zhu XF, et al. Abnormal expression of P2X family receptors in Chinese pediatric acute leukemias. *Biochem Biophys Res Commun.* 2010;391(1):498-504.



## Figures

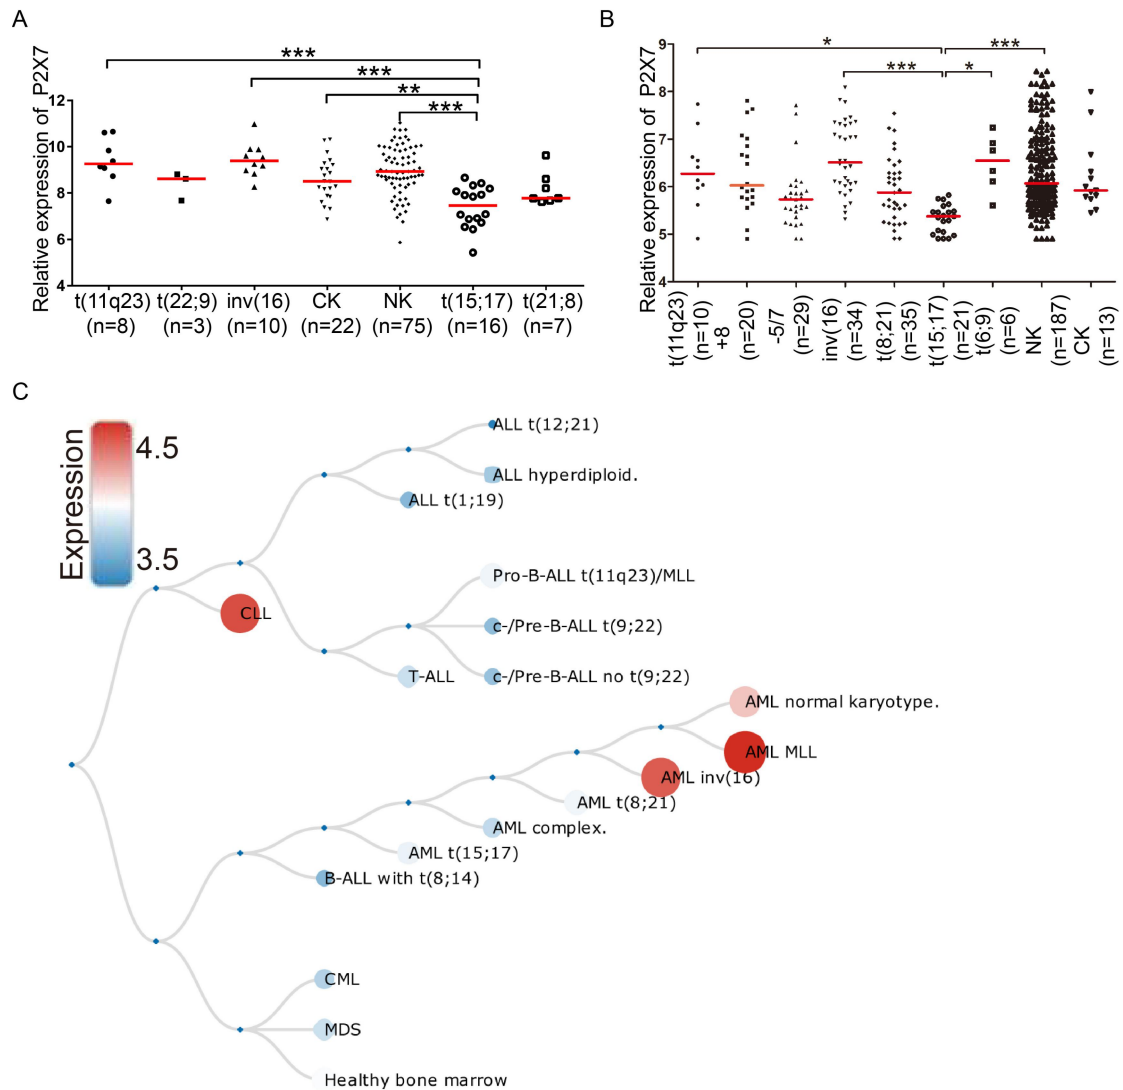

**Figure 1**

**Expression of P2X7 in leukemia patients.** **(A)** The relative expression of P2X7 in leukemia patients with t(11q23), t(22;9), inv(16), complex cytogenetics (CK), normal karyotype (NK), t(15;17) and t(21;8) was obtained from TCGA datasets. **(B)** The relative expression of P2X7 in leukemia patients with t(11q23), +8, -5/7(q), inv(16), t(8;21), t(15;17), t(6;9), NK, CK was obtained from GSE6891. **(C)** The tree map of P2X7 expression in different subtypes of leukemia was obtained from BloodSpot (<http://servers.binf.ku.dk/bloodspot/?gene=P2RX7&dataset=allmile>). Red and blue represent high and low expression levels, respectively. Bars represent mean  $\pm$  SEM.

\* $p < 0.05$ ; \*\* $p < 0.01$ ; \*\*\* $p < 0.001$ .

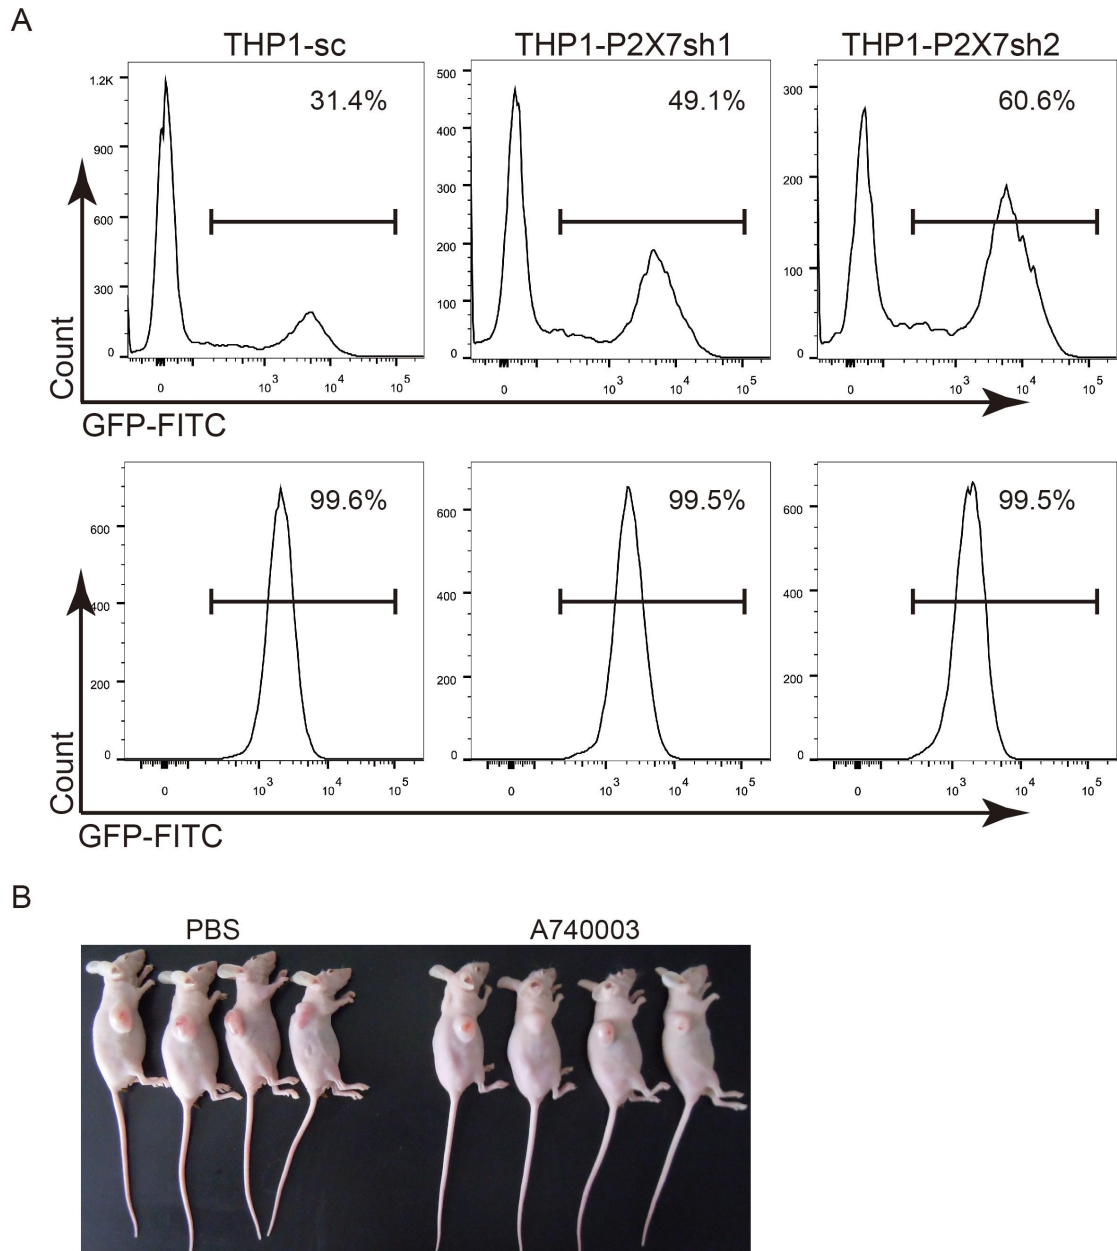

**Figure 2**

**The expression and function of P2X7 are suppressed in THP1 cells. (A)** THP1 cells were infected with pLV-sc, pLV-P2X7sh1 or pLV-P2X7sh2 lentivirus to establish THP1-sc, THP1-P2X7sh1 and THP1-P2X7sh2 cell lines, respectively. The percentage of GFP<sup>+</sup> cells before (upper) and after (lower) cell sorting is shown. **(B)** Nude mouse xenograft model was established by inoculation of THP1 cells. From days 12, intratumoral administration of PBS or A740003 was done every two days. Mice were sacrificed on days 23.

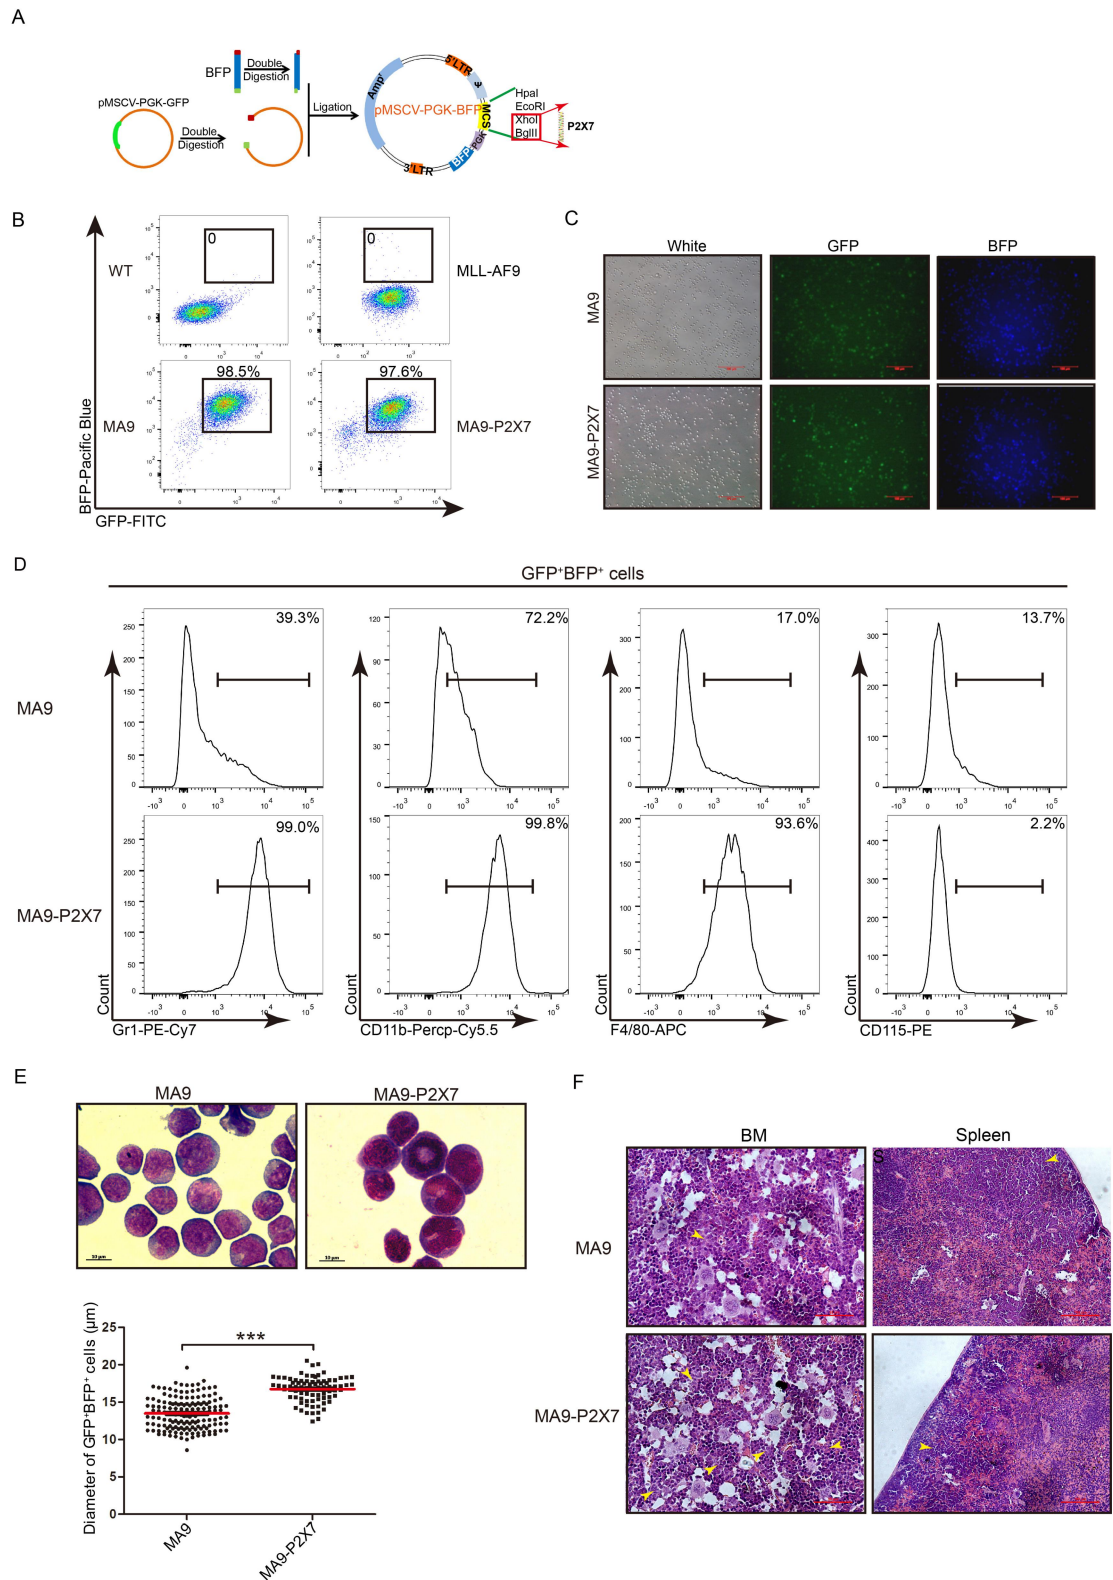

**Figure 3**

**Establishment of mouse AML model caused by MLL-AF9-induced AML cells overexpressing P2X7. (A)** Experimental design for the construction of pMSCV-PGK-BFP vector and recombinant plasmid carrying P2X7 cDNA. **(B)** Mice

were sacrificed and GFP<sup>+</sup>BFP<sup>+</sup> cells were analysis by flow cytometry. The double positive rate of WT, MLL-AF9, MA9 and MA9-P2X7 cells in GFP<sup>+</sup> cells is shown. **(C)** GFP<sup>+</sup>BFP<sup>+</sup> leukemia cells were detected under fluorescence microscope. **(D)** The surface markers (Gr1, CD11b, F4/80 and CD115) of MA9 and MA9-P2X7 cells were studied by flow cytometry. **(E)** Morphological analysis of sorted MA9 and MA9-P2X7 AML cells by Wright-Giemsa staining. Scale bars, 20  $\mu$ m. Diameter of cells was measured under light microscope. **(F)** Typical HE stained BM and spleen tissue sections from MA9 and MA9-P2X7 mice are shown. Scale bars, 100  $\mu$ m. Bars represent mean  $\pm$  SEM. \*\*\*  $p < 0.001$ .

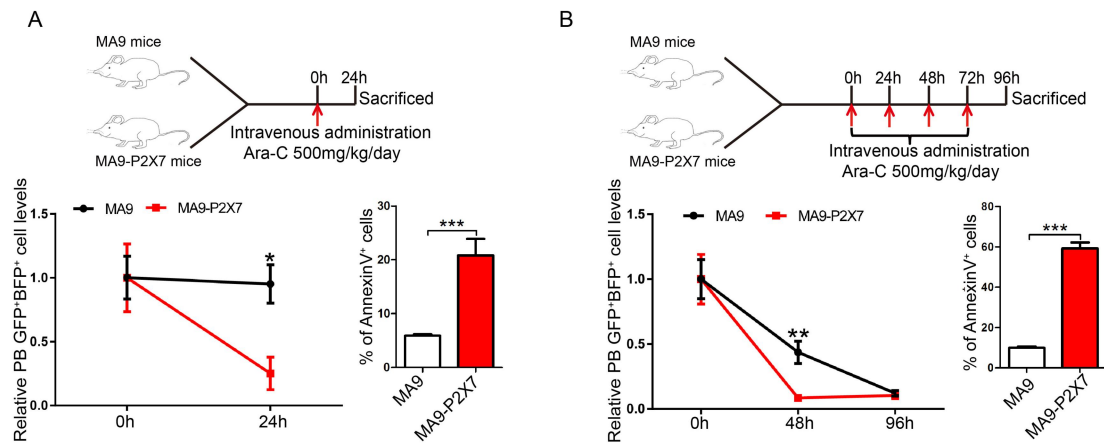

**Figure 4**

**Effects of Ara-C treatment on MA9 and MA9-P2X7 mice. (A)** The schedule for single-dose administration of Ara-C to is shown (*upper*). The relative GFP+BFP<sup>+</sup> leukemia cells levels in PB was monitored (*lower left*). The apoptotic rate of BM leukemia cells at 24 hrs was detected (*lower right*) (n=5). **(B)** The schedule for multiple-dose administrations of Ara-C to leukemic mice is shown (*upper*). The relative GFP+BFP<sup>+</sup> leukemia cells levels in PB was monitored (*lower left*). The apoptotic rate of BM leukemia cells at 96 hrs was detected (*lower right*) (n=5). The proportion of leukemia cells at 24 hrs, 48 hrs and 96 hrs was normalized to that at 0 h. Bars represent mean  $\pm$  SEM. \* $p < 0.05$ ; \*\* $p < 0.01$ ; \*\*\* $p < 0.001$ .

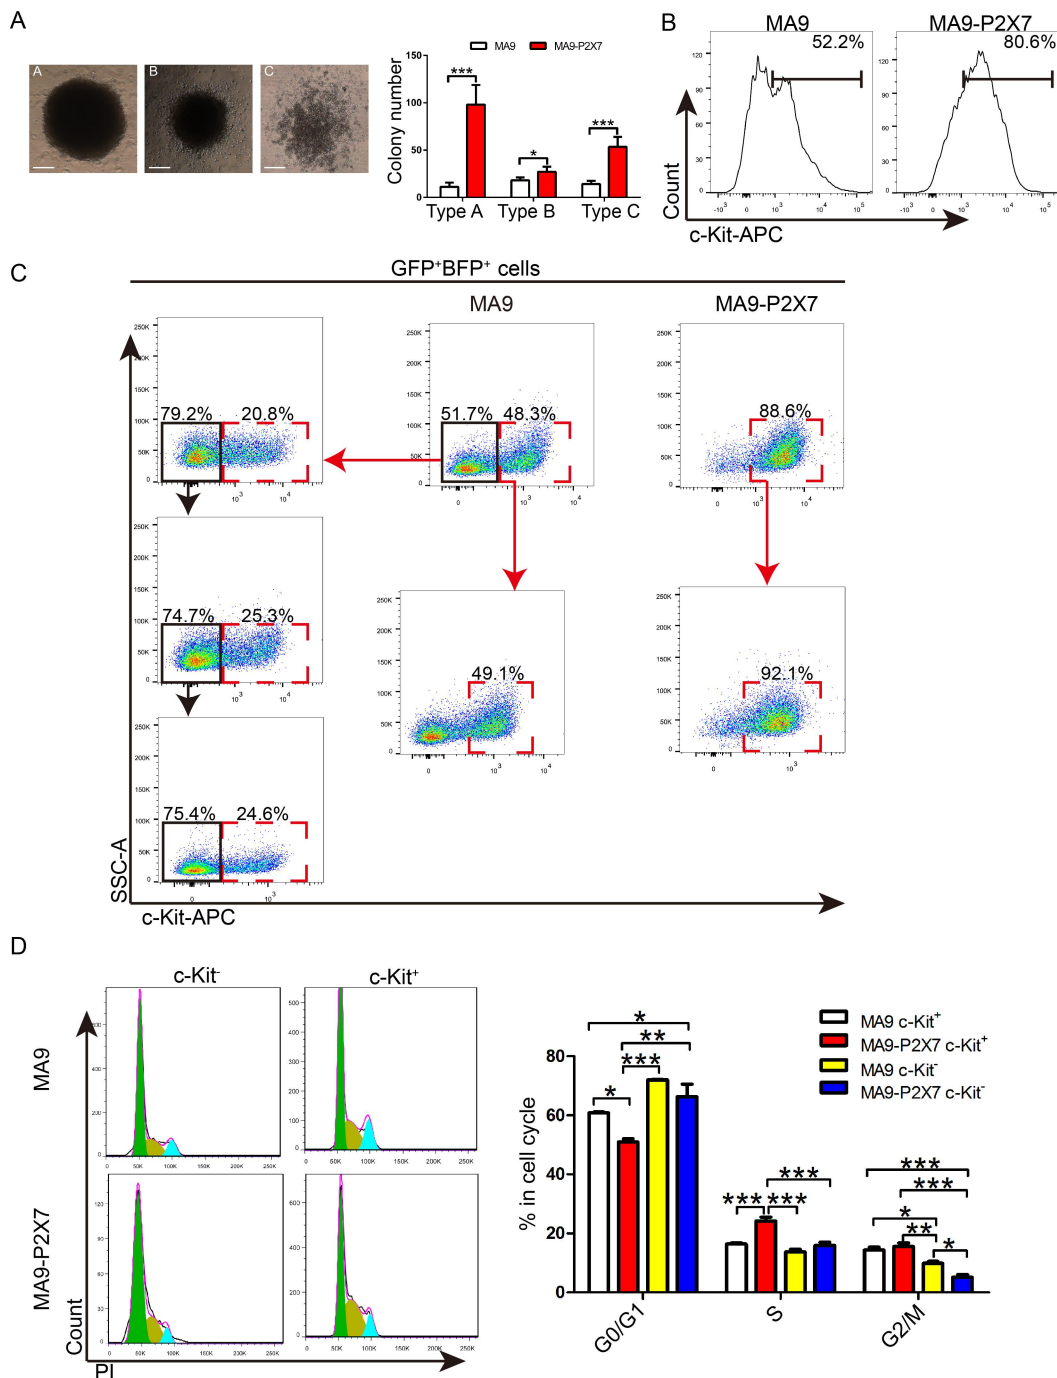

**Figure 5**

**MA9-P2X7 cells have more LSCs. (A)** Typical type A, B and C colonies are shown (*left*). Colony numbers of different types are plotted (*right*). **(B)** Colony cells of MA9 and MA9-P2X7 were stained with c-Kit. Percentage of c-Kit<sup>+</sup> cells is shown. **(C)** C-Kit<sup>+</sup> (black solid box) population was sorted from MA9 cells while c-Kit<sup>+</sup> (red dotted box) populations were sorted from MA9 and MA9-P2X7 cells. MA9-P2X7 c-Kit<sup>+</sup> (*right*) and MA9 c-Kit<sup>+</sup> (*middle*) cells were undergone transplantation while MA9 c-Kit<sup>-</sup> cells (*left*)

were undergone serial transplantations. Typical flow cytometry results showed the frequencies of c-Kit<sup>-</sup> and c-Kit<sup>+</sup> populations. **(D)** Leukemia cells were sorted and stained with PI. Gating strategy for G0/G1 (green), S (khaki), and G2/M (blue) phase cells was shown. The percentage of them is plotted. Bars represent mean  $\pm$  SEM. \* $p < 0.05$ ; \*\* $p < 0.01$ ; \*\*\* $p < 0.001$ .

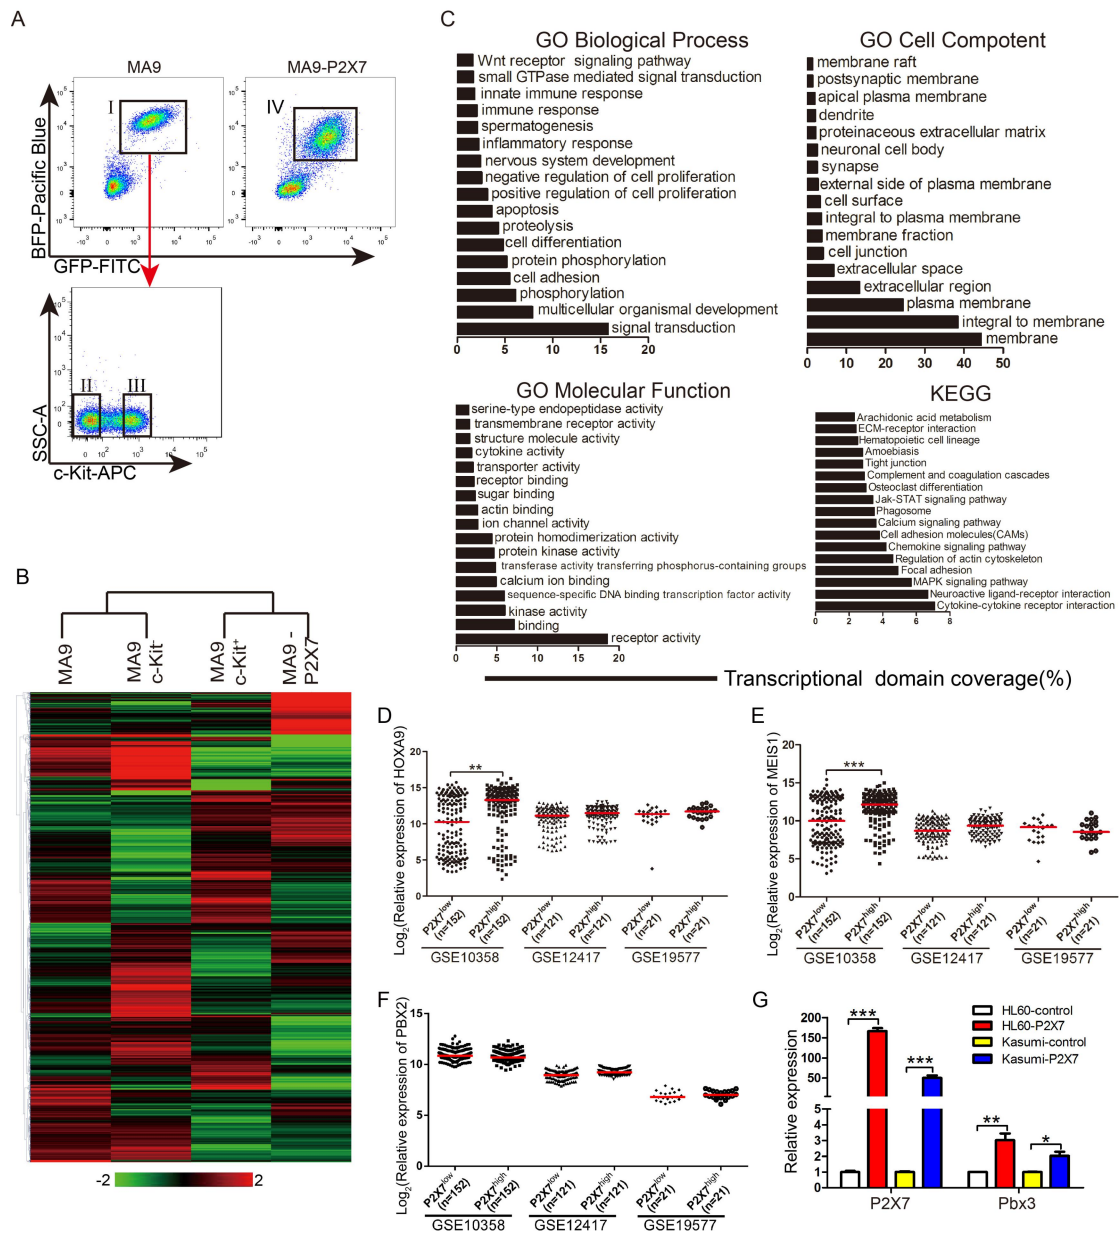

**Figure 6**

**Microarray analysis to identify key molecules mediating pro-leukemic effects of P2X7 in MLL-AF9-induced AML cells.** (A) Gating strategy for sorting MA9 (gate I) , MA9 c-Kit<sup>-</sup> (gate II), MA9 c-Kit<sup>+</sup> (gate III), and MA9-P2X7 (gate IV) cells, which were sent for microarray analysis. (B) Hierarchical clustering analysis of gene expression profiles among four populations, which were normalized to a quantile algorithm. (C) GO and KEGG analyses of DEGs between MA9-P2X7 and MA9. (D-F) Correlation between the expression of P2X7 and HOXA9, MEIS1, PBX2 was studied from GSE10358 (n=304), GSE12417 (n=242) and GSE19577 (n=42). For each dataset,



AML cases were divided into P2X7<sup>low</sup> and P2X7<sup>high</sup> groups according to median value of P2X7, and the expression of HOXA9, MEIS1 and PBX2 is plotted. **(G)** HL60 and Kasumi cells were infected with blank (control) or pMSCV-P2X7 (P2X7). GFP<sup>+</sup> cells were sorted and the expression of P2X7 and Pbx3 was detected by qRT-PCR. Bars represent mean  $\pm$  SEM. \* $p < 0.05$ ; \*\* $p < 0.01$ ; \*\*\* $p < 0.001$ .

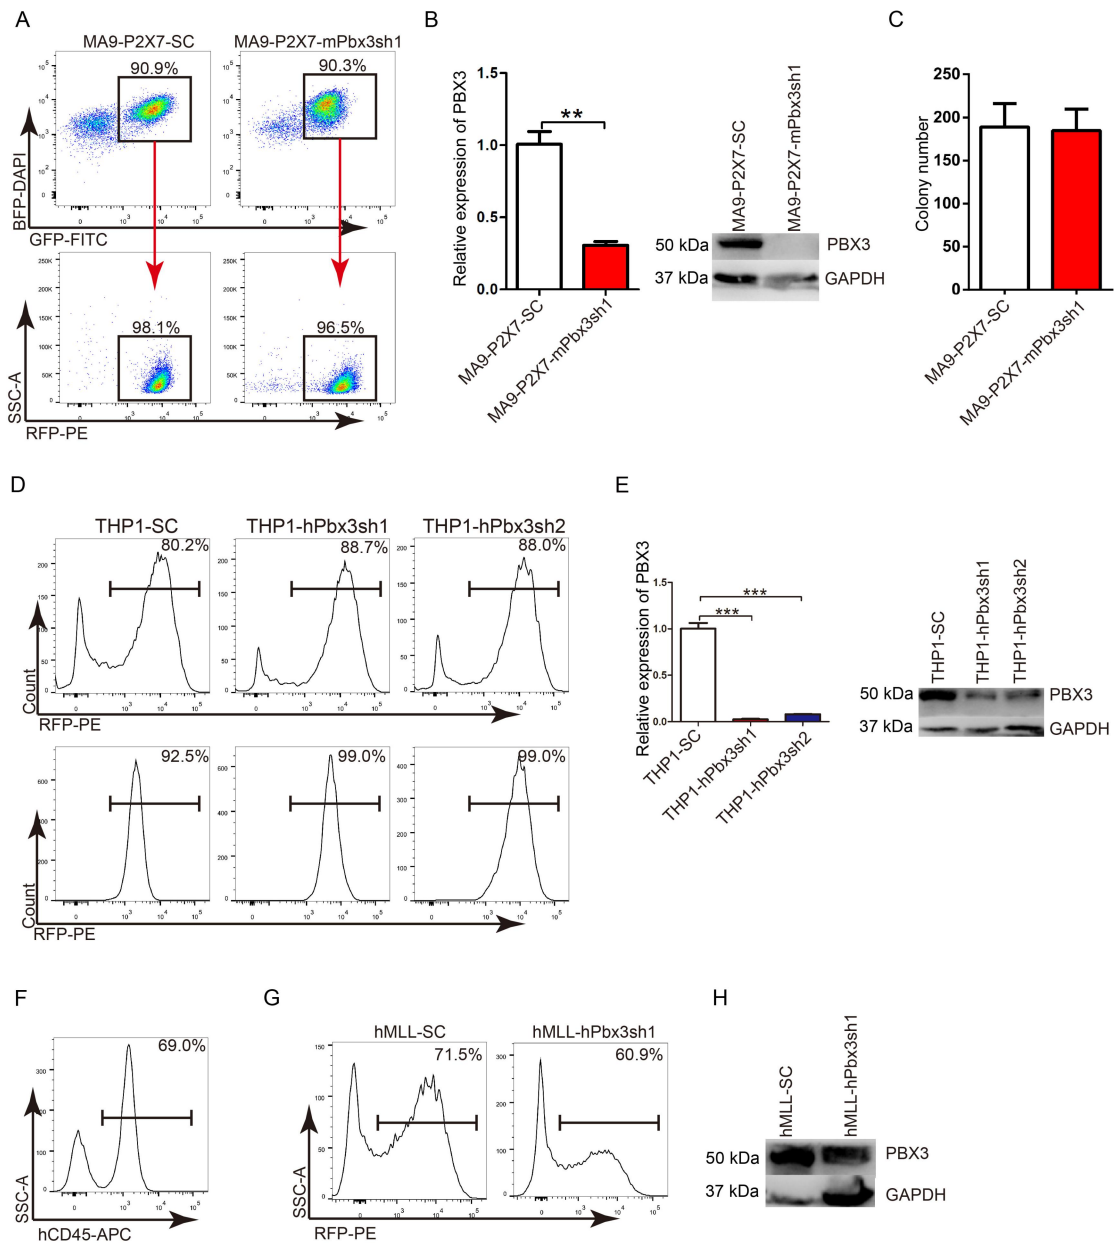

**Figure 7**

**Knockdown of Pbx3 expression in mouse and human AML cells with *MLL* translocation. (A,B)** Pbx3 was suppressed in MA9-P2X7 cells by shRNA against Pbx3. **(A)** MA9-P2X7-SC and MA9-P2X7-mPbx3sh1 cell lines (GFP<sup>+</sup>BFP<sup>+</sup>RFP<sup>+</sup>) were verified by flow cytometry. **(B)** KD efficiency of Pbx3 in MA9-P2X7 was identified by qRT-PCR (left), western blot (right). **(C)** GFP<sup>+</sup>BFP<sup>+</sup>RFP<sup>+</sup> leukemia cells were sorted and seeded onto 24-well plates (500 cells/well) for colony forming assay. Colony numbers are plotted. **(D)** THP1 cells were infected with pLV-SC, pLV-hPbx3sh1 and pLV-hPbx3sh2. Typical flow cytometry results before (*upper panel*) and after (*lower*

*panel*) cell sorting are shown. **(E)** KD efficiency of Pbx3 in THP1 was identified by qRT-PCR (*left*), western blot (*right*). **(F)** The patient derived xenograft model by an AML patient with *MLL* translocation and high levels of P2X7 expression were established. Human leukemia cells were sorted for lentivirus infection. **(G)** Leukemia cells were infected with pLV-SC or pLV-hPbx3sh1. Typical flow cytometry results are shown. **(H)** KD efficiency of Pbx3 was identified by western blot. Bars represent mean  $\pm$  SEM. \*\*\*  $p < 0.001$ .

## Tables

**Table 1. Main characteristics of newly diagnosed AML patients obtained from Blood Diseases Hospital, CAMS & PUMC**

| Patient ID | Gender | Age | FAB Subtype | Karyotype                                          | Fusion gene | WBC    | HGB | PLT |
|------------|--------|-----|-------------|----------------------------------------------------|-------------|--------|-----|-----|
| 1          | Male   | 11  | M3          | 46,XY,t(15;17)(q22;q21) [7]                        | PML/RARa    | 27.65  | 83  | 16  |
| 2          | Male   | 4   | M5          | 46,XY,6p+,11q-                                     | TCR/IGK     | 5.45   | 79  | 8   |
| 3          | Male   | 15  | M3          | 46,XY[1]                                           | -           | 2.18   | 93  | 40  |
| 4          | Female | 4   | M2b         | 46,XX,t(8;21)(q22;q22)[15]                         | AML1/ETO    | 5.42   | 51  | 13  |
| 5          | Male   | 6   | M6          | 46,XY,t(3;5,?),13q-,15q-[5]                        | -           | 31.14  | 52  | 16  |
| 6          | Female | 11  | M2b         | 45,X,-Y,t(8;21;10)(q22;q22;q26),del(9)(q11q22)[11] | AML1/ETO    | 23.03  | 70  | 42  |
| 7          | Female | 10  | M5a         | 46,XX,t(9;22)(q34;q11)[5]                          | BCR/ABL190  | 108.57 | 123 | 133 |
| 8          | Female | 18  | M3          | 46,XX                                              | PML/RARa    | 1.39   | 88  | 40  |
| 9          | Male   | 18  | AML         | 47-50,XY,+X,+7,+13,+15,-16,+18[C P4]/46,XY[4]      | -           | 255.93 | 112 | 80  |
| 10         | Male   | 9   | M2b         | 46,XY,t(8;21)(q22;q22)[7]/46,XY[3]                 | AML1/ETO    | 10.59  | 59  | 25  |
| 11         | Female | 7   | M3          | 42,XX,-8,-16,-19,-21[1]                            | PML/RARa    | 1.5    | 69  | 7   |
| 12         | Male   | 3   | M3          | 46,XY,t(15;17)(q22;q12)[6]                         | PML/RARa    | 226.03 | 59  | 43  |
| 13         | Male   | 16  | M3          | 46,XY,t(15;17)(q22;q21) [7]                        | PML/RARa    | 1.65   | 71  | 2   |

2;q12)[15]

|     |        |    |     |                                                                                |          |        |     |     |
|-----|--------|----|-----|--------------------------------------------------------------------------------|----------|--------|-----|-----|
| 14  | Male   | 10 | M2b | 46-47,XY,1p+.2p-<br>,+4,t(8;21)(q22;q<br>22),-15,+mark[cp<br>3]                | AML1/ETO | 35.74  | 118 | 107 |
| 15  | Male   | 6  | M2b | 50,XX,YY,t(8;21)(<br>22,q22)x2[3]/45,<br>X,-Y,t(8;21)(q22;q<br>22)[7]/46,XY[2] | AML1/ETO | 5.17   | 62  | 58  |
| 16  | Female | 9  | M5  | 46,XX[8]                                                                       | -        | 193.15 | 70  | 53  |
| 17  | Male   | 3  | M2a | 46,XY                                                                          | -        | 110    | 68  | 19  |
| 18  | Female | 11 | M5  | 47,XX,+8[3]                                                                    | -        | 103.01 | 57  | 81  |
| 19* | Male   | 6  | M5  | 46,XY                                                                          | MLL      | 426    | 85  | 20  |
| 20  | Female | 1  | M5  | 47,XX,+8                                                                       | MLL      | 47.59  | 113 | 133 |

**NOTE:** FAB, French-American-British criteria for subtypes. The clinical data were collected at initial diagnosis. WBC, white blood cell count ( $\times 10^9/L$ ); HGB, hemoglobin ( $\times g/L$ ); PLT, platelet ( $\times 10^9/L$ ); -, unknown or undetected; \*This patient has *MLL* translocation and high levels of P2X7 expression. The xenotransplantation model in NOD/SCID mice with AML primary cells from this patient was established.

**Table 2. Websites to download detailed characteristics of AML patients from public database**

| Public Database     | Websites                                                                                                                                                                                                                                                                                                                                                                                                                                                                                                                                                                                                                                                        | Patient Characteristics Provided                                                                                                                                                                                                                                                                                                                                                                                                  | Reference                                 |
|---------------------|-----------------------------------------------------------------------------------------------------------------------------------------------------------------------------------------------------------------------------------------------------------------------------------------------------------------------------------------------------------------------------------------------------------------------------------------------------------------------------------------------------------------------------------------------------------------------------------------------------------------------------------------------------------------|-----------------------------------------------------------------------------------------------------------------------------------------------------------------------------------------------------------------------------------------------------------------------------------------------------------------------------------------------------------------------------------------------------------------------------------|-------------------------------------------|
| TCGA                | <a href="https://portal.gdc.cancer.gov/repository?facetTab=cases&amp;filters=%7B%22op%22%3A%22and%22%2C%22content%22%3A%5B%7B%22op%22%3A%22in%22%2C%22content%22%3A%7B%22field%22%3A%22cases.primary_site%22%2C%22value%22%3A%5B%22hematopoietic%20and%20reticuloendothelial%20systems%22%5D%7D%7D%5D%7D&amp;searchTableTab=cases">https://portal.gdc.cancer.gov/repository?facetTab=cases&amp;filters=%7B%22op%22%3A%22and%22%2C%22content%22%3A%5B%7B%22op%22%3A%22in%22%2C%22content%22%3A%7B%22field%22%3A%22cases.primary_site%22%2C%22value%22%3A%5B%22hematopoietic%20and%20reticuloendothelial%20systems%22%5D%7D%7D%5D%7D&amp;searchTableTab=cases</a> | Gender, age, race, bone marrow blast percentage, PB blast percentage, WBC, AML in skin percentage, subclones, cytogenetics, genomic rearrangement, cytogenetic code, histological subtype, risk (Cyto), risk (Molecular), structural variants from WGS, DFS months, DFS status, OS months, OS status, induction, type of transplant (sib Allo, MUD, Auto, etc) , dark zone stat at transplant, disease type, cancer type detailed |                                           |
| <b>GEO DataSets</b> |                                                                                                                                                                                                                                                                                                                                                                                                                                                                                                                                                                                                                                                                 |                                                                                                                                                                                                                                                                                                                                                                                                                                   |                                           |
| GSE13204            | <a href="https://www.ncbi.nlm.nih.gov/geo/query/acc.cgi?acc=GSE13204">https://www.ncbi.nlm.nih.gov/geo/query/acc.cgi?acc=GSE13204</a>                                                                                                                                                                                                                                                                                                                                                                                                                                                                                                                           | Sample type, sample source name, sample organism, sample characteristics with disease type and genomic rearrangement, sample treatment protocol, sample growth protocol, sample extract protocol                                                                                                                                                                                                                                  | PMID:<br>18573112<br>20406941<br>20065290 |
| GSE19577            | <a href="https://www.ncbi.nlm.nih.gov/geo/query/acc.cgi?acc=GSE19577">https://www.ncbi.nlm.nih.gov/geo/query/acc.cgi?acc=GSE19577</a>                                                                                                                                                                                                                                                                                                                                                                                                                                                                                                                           | Sample type, sample source name, sample organism, sample characteristics with disease type, sample description with genomic rearrangement, sample extract protocol                                                                                                                                                                                                                                                                | PMID:<br>21331072                         |
| GSE12417            | <a href="https://www.ncbi.nlm.nih.gov/geo/query/acc.cgi?acc=GSE12417">https://www.ncbi.nlm.nih.gov/geo/query/acc.cgi?acc=GSE12417</a>                                                                                                                                                                                                                                                                                                                                                                                                                                                                                                                           | Sample type, sample source name, sample organism, sample description with disease type, genomic rearrangement,                                                                                                                                                                                                                                                                                                                    | PMID:<br>18716133                         |

FAB subtype, age, OS months, OS status,  
sample treatment protocol, sample growth  
protocol, sample extract protocol

|          |                                                                                                                                       |                                                                                                                                                                                                                         |                      |
|----------|---------------------------------------------------------------------------------------------------------------------------------------|-------------------------------------------------------------------------------------------------------------------------------------------------------------------------------------------------------------------------|----------------------|
| GSE10358 | <a href="https://www.ncbi.nlm.nih.gov/geo/query/acc.cgi?acc=GSE10358">https://www.ncbi.nlm.nih.gov/geo/query/acc.cgi?acc=GSE10358</a> | Sample type, sample source name, PMID:<br>sample organism, sample characteristics<br>with FAB subtype, age, gender, race,<br>cytogenetics, genomic rearrangement,<br>sample growth protocol, sample extract<br>protocol | 18270328<br>19651600 |
|----------|---------------------------------------------------------------------------------------------------------------------------------------|-------------------------------------------------------------------------------------------------------------------------------------------------------------------------------------------------------------------------|----------------------|

**Table 3. Main characteristics of AML patients and treatment types received in P2X7<sup>high</sup> and P2X7<sup>low</sup> groups from TCGA database**

|                                                    | No. of cases                     |                                   |
|----------------------------------------------------|----------------------------------|-----------------------------------|
|                                                    | P2X7 <sup>low</sup> group (n=87) | P2X7 <sup>high</sup> group (n=86) |
| Gender                                             |                                  |                                   |
| Male                                               | 43 (49.4%)                       | 38 (44.2%)                        |
| Female                                             | 44 (50.6%)                       | 48 (55.8%)                        |
| Age at diagnosis, median                           | 56 (IQR, 22-82)                  | 60 (IQR, 18-88)                   |
| FAB subtype                                        |                                  |                                   |
| M0                                                 | 8 (9.2%)                         | 8 (9.3%)                          |
| M1                                                 | 29 (33.3%)                       | 15 (17.4%)                        |
| M2                                                 | 25 (28.7%)                       | 13 (15.1%)                        |
| M3                                                 | 16 (18.4%)                       | 0 (0)                             |
| M4                                                 | 3 (3.5%)                         | 31 (36.1%)                        |
| M5                                                 | 3 (3.5%)                         | 15 (17.4%)                        |
| M6                                                 | 1 (1.1%)                         | 1 (1.2%)                          |
| M7                                                 | 2 (2.3%)                         | 1 (1.2%)                          |
| NC                                                 | 0 (0)                            | 2 (2.3%)                          |
| BM blasts at diagnosis, median percentage          | 71 (IQR, 30-100)                 | 73.5 (IQR, 30-98)                 |
| PB blasts at diagnosis, median percentage          | 44 (IQR, 0-98)                   | 28.5 (IQR, 0-97)                  |
| WBC at diagnosis, median count ( $\times 10^9/L$ ) | 10.1 (IQR, 0.4-297.4)            | 26.85 (IQR, 0.8-137.2)            |
| Cytogenetic code                                   |                                  |                                   |
| BCR-ABL1                                           | 2 (2.3%)                         | 1 (1.2%)                          |
| CBFB-MYH11                                         | 1 (1.1%)                         | 9 (10.5%)                         |
| Complex Cytogenetics                               | 12 (13.8%)                       | 10 (11.6%)                        |
| Intermediate Risk Cytogenetic                      | 10 (11.5%)                       | 10 (11.6%)                        |



#### Abnormality

|                                   |            |            |
|-----------------------------------|------------|------------|
| MLL translocation                 | 0 (0)      | 4 (4.7%)   |
| Normal Karyotype                  | 33 (37.9%) | 47 (54.6%) |
| PML-RARA                          | 15 (17.3%) | 0 (0)      |
| Poor Risk Cytogenetic Abnormality | 7 (8.1%)   | 2 (2.3%)   |
| RUNX1-RUNX1T1                     | 6 (6.9%)   | 1 (1.2%)   |
| N.D.                              | 1 (1.1%)   | 2 (2.3%)   |

#### Histological subtype

|                               |            |            |
|-------------------------------|------------|------------|
| BCR-ABL1                      | 2 (2.3%)   | 1 (1.2%)   |
| CBFB-MYH11                    | 1 (1.1%)   | 9 (10.5%)  |
| Complex Cytogenetics          | 12 (13.8%) | 10 (11.6%) |
| Intermediate Risk Cytogenetic | 9 (10.4%)  | 8 (9.3%)   |

#### Abnormality

|                                   |            |            |
|-----------------------------------|------------|------------|
| MLL translocation                 | 2 (2.3%)   | 6 (7.0%)   |
| Normal Karyotype                  | 31 (35.6%) | 44 (51.1%) |
| PML-RARA                          | 16 (18.4%) | 0 (0)      |
| NUP98 translocation               | 0 (0)      | 3 (3.5%)   |
| Poor Risk Cytogenetic Abnormality | 7 (8.1%)   | 2 (2.3%)   |
| RUNX1-RUNX1T1                     | 6 (6.9%)   | 1 (1.2%)   |
| N.D.                              | 1 (1.1%)   | 2 (2.3%)   |

#### Risk (Molecular)

|              |            |            |
|--------------|------------|------------|
| Good         | 23 (26.4%) | 10 (11.6%) |
| Intermediate | 40 (46.0%) | 52 (60.5%) |
| Poor         | 23 (26.5%) | 22 (25.6%) |
| N.D.         | 1 (1.1%)   | 2 (2.3%)   |

#### Risk (Cyto)

|              |            |            |
|--------------|------------|------------|
| Good         | 22 (25.3%) | 10 (11.6%) |
| Intermediate | 43 (49.4%) | 58 (67.5%) |
| Poor         | 21 (24.2%) | 16 (18.6%) |

|                     |                      |                       |
|---------------------|----------------------|-----------------------|
| N.D.                | 1 (1.1%)             | 2 (2.3%)              |
| DFS, median months  | 11.40 (IQR, 0-100.5) | 8.45 (IQR, 0.1-99.9)  |
| DFS status          |                      |                       |
| Disease Free        | 49 (56.4%)           | 40 (46.5%)            |
| Recurred/Progressed | 37 (42.5%)           | 45 (52.3%)            |
| NA                  | 1 (1.1%)             | 1 (1.2%)              |
| OS, median months   | 26.30 (IQR, 0-118.1) | 11.15 (IQR, 0.1-99.9) |
| OS status           |                      |                       |
| Living              | 35 (40.2%)           | 24 (27.9%)            |
| Deceased            | 52 (59.8%)           | 62 (72.1%)            |
| Induction           |                      |                       |
| 7+3                 | 25 (28.7%)           | 35 (40.7%)            |
| 7+3+3               | 23 (26.5%)           | 22 (25.6%)            |
| 7+3+3, gleevec      | 1 (1.1%)             | 0 (0)                 |
| 7+3+3+PSC           | 3 (3.5%)             | 1 (1.2%)              |
| 7+3+AMD             | 1 (1.1%)             | 1 (1.2%)              |
| 7+3+ATRA            | 12 (13.8%)           | 0 (0)                 |
| 7+3+Genasense       | 1 (1.1%)             | 2 (2.3%)              |
| 7+3+study drug      | 1 (1.1%)             | 2 (2.3%)              |
| 7+3+dauno           | 1 (1.1%)             | 2 (2.3%)              |
| 7+4+ATRA            | 2 (2.3%)             | 0 (0)                 |
| Decitabine          | 7 (8.1%)             | 7 (8.1%)              |
| Revlimid            | 3 (3.5%)             | 6 (7.0%)              |
| Others              | 7 (8.1%)             | 8 (9.3%)              |

**Table 4. The list of the genes satisfy the condition (FC  $\geq$  2.0) in all populations**

| <b>Gene</b>  | <b>MA9</b> | <b>MA9 c-Kit<sup>+</sup></b> | <b>MA9 c-Kit<sup>-</sup></b> | <b>MA9-P2X7</b> |
|--------------|------------|------------------------------|------------------------------|-----------------|
| Hnf4a        | 4.315762   | 4.981476                     | 5.12598                      | 14.53355        |
| Six1         | 5.042897   | 5.583961                     | 5.224246                     | 13.77709        |
| Gprasp2      | 5.278139   | 5.244366                     | 5.24583                      | 13.07547        |
| Six4         | 4.76146    | 4.516208                     | 1.897203                     | 9.44581         |
| Xlr          | 6.787568   | 5.374322                     | 5.014948                     | 11.02067        |
| Gm14625      | 6.690696   | 5.434371                     | 5.113621                     | 10.80462        |
| Gm2030       | 6.754176   | 5.446716                     | 5.209487                     | 10.8959         |
| Pdgfrl       | 7.868452   | 7.972529                     | 6.872536                     | 12.4145         |
| Zdhhc2       | 5.381557   | 5.658747                     | 4.633071                     | 9.921941        |
| Abcb9        | 9.355733   | 10.57929                     | 8.721681                     | 13.94806        |
| Paqr5        | 6.197612   | 5.911735                     | 6.263482                     | 11.45583        |
| LOC102638793 | 5.9447     | 4.969644                     | 5.068087                     | 10.0132         |
| Zfp820       | 5.062906   | 4.194351                     | 4.036269                     | 8.742249        |
| Pbx3         | 10.21993   | 9.215693                     | 10.47261                     | 15.08317        |
| Hkdc1        | 5.428403   | 5.033161                     | 5.795447                     | 10.1967         |
| Abcg2        | 6.265685   | 7.351389                     | 5.952943                     | 10.3353         |
| Akr1c13      | 7.754127   | 7.503615                     | 7.520504                     | 11.88503        |
| Slc39a8      | 8.216914   | 7.643287                     | 6.501695                     | 10.71311        |
| Stab2        | 5.48605    | 5.734866                     | 4.660516                     | 8.778222        |
| Gm13298      | 5.843244   | 5.938307                     | 4.905674                     | 8.885473        |
| Usp51        | 5.520485   | 5.676248                     | 4.122709                     | 7.93472         |
| Rbp4         | 6.814951   | 6.71742                      | 8.039157                     | 11.84367        |
| Farp1        | 6.593319   | 6.48847                      | 5.654502                     | 9.309437        |
| Dlk1         | 6.1247     | 5.729072                     | 6.24702                      | 9.85371         |
| Hdc          | 11.49419   | 10.31877                     | 11.31893                     | 14.91544        |
| Rtp4         | 6.37367    | 5.597343                     | 6.752101                     | 10.33988        |
| Serpina11    | 9.596564   | 9.95379                      | 8.698203                     | 12.14983        |

|               |          |          |          |          |
|---------------|----------|----------|----------|----------|
| Hoxb13        | 6.660536 | 5.360974 | 6.643797 | 10.02119 |
| 4933409K07Rik | 5.312283 | 5.184112 | 4.069137 | 7.180141 |
| Gm13298       | 5.583842 | 5.552136 | 5.412778 | 8.467941 |
| Prg3          | 8.010638 | 8.60393  | 8.509789 | 11.5526  |
| Ffar4         | 4.766295 | 5.22853  | 5.83119  | 8.820567 |
| Atp6v1g3      | 5.398016 | 4.255027 | 5.289241 | 8.24122  |
| 4930500A05Rik | 7.556674 | 6.9017   | 6.829518 | 9.660049 |
| LOC102636053  | 7.145287 | 6.402517 | 5.977464 | 8.781041 |
| Dusp18        | 4.474358 | 5.535305 | 5.439974 | 8.135218 |
| Vstm5         | 4.229132 | 5.317394 | 4.815373 | 7.498062 |
| Nefh          | 6.334524 | 6.405229 | 6.010756 | 8.578825 |
| Alas2         | 5.475668 | 4.775726 | 4.155989 | 6.677557 |
| Angpt1        | 9.128366 | 8.286065 | 9.404198 | 11.92548 |
| Tnfsf13b      | 5.821169 | 6.305813 | 5.956012 | 8.449716 |
| Mical3        | 6.552386 | 5.548242 | 6.494635 | 8.972683 |
| Serpina11     | 9.111115 | 9.452453 | 8.803384 | 11.01234 |
| Car13         | 4.81504  | 4.926811 | 4.999743 | 7.188988 |
| Rspo1         | 8.381624 | 8.885473 | 8.507838 | 10.52745 |
| Zscan18       | 5.547385 | 5.027604 | 4.721982 | 6.669403 |
| Dclk2         | 5.724476 | 5.487093 | 5.889796 | 7.836155 |
| Slc23a2       | 5.495347 | 5.55005  | 5.186237 | 6.88388  |
| Alpi          | 4.050382 | 4.44265  | 3.896716 | 5.508654 |
| Cctn          | 5.763858 | 5.567925 | 5.770294 | 7.134366 |

---

**Table 5. List of the primers used in qRT-PCR in this study**

| <b>Genes</b>   | <b>Forward</b>                 | <b>Reverse</b>                  |
|----------------|--------------------------------|---------------------------------|
| <i>hGAPDH</i>  | 5'-GAAGGTGAAGGTCGGAGTC-3'      | 5'-GAAGATGGTGATGGGATTC-3'       |
| <i>mGapdh</i>  | 5'-CACTTGAAGGGTGGAGC-3'        | 5'-GGGCTAAGCAGTTGGTG-3'         |
| <i>hP2X7</i>   | 5'-TTGACACCGCAGACTACACCTT-3'   | 5'-GGCACCAGGCAGAGACTTCA-3'      |
| <i>mHoxa9</i>  | 5'-GTGTTTGGTGCCTCGTGGAA-3'     | 5'-CGCCTTCGCTGGGTTGTTT-3'       |
| <i>hHOXA9</i>  | 5'-ACCACCACCATCACCACCA-3'      | 5'-GGAGGAGAACCACAAGCATAGTCA-3'  |
| <i>mMeis1</i>  | 5'-CAGCACAGGTGACGATGATGAC-3'   | 5'-GCTCGGTTGGACTGGTCTATCA-3'    |
| <i>hMEIS1</i>  | 5'-CAGCAGTGAGCAAGGTGATGG-3'    | 5'-GGATGGTGAGTCCCGTGTCT-3'      |
| <i>mAbcb9</i>  | 5'-TGCCGAGAGCGAATACCTGATT-3'   | 5'-TCCTTGTGGCTGGCTGTGTA-3'      |
| <i>mDusp18</i> | 5'-TCCAGCAATCAGATCACCACAGT-3'  | 5'-ATGAGGTAGGCGAGGCACAG-3'      |
| <i>mHoxb13</i> | 5'-GGCTACCTACCCTTCGGAAACT-3'   | 5'-TTCACCTTGGCAACACATCTGG-3'    |
| <i>hPBX3</i>   | 5'-AGCATCACAGTGTCACAGGTATCC-3' | 5'-GGCGAATTGGTCTGGTTGTTCTG-3'   |
| <i>mPbx3</i>   | 5'-GGTCTTCAGATAACTCTATTG-3'    | 5'-GGAGAAGGTTTCATCACAT-3'       |
| <i>mRbp4</i>   | 5'-CGAGTCCGCTTCTGAGCAACT-3'    | 5'-CACCAGCCTCCGTGTCTCT-3'       |
| <i>mRhbdl3</i> | 5'-CAATCACGCTGCTGGAGGTT-3'     | 5'-CAAGGAGCCTGCCACAACAC-3'      |
| <i>mRspo1</i>  | 5'-TCTGCTGGAGAGGAACGACATC-3'   | 5'-GGACCACTCGCTCATTTCACATTG-3'  |
| <i>mPbx2</i>   | 5'-TGCCCTGTTTAGTGTCTGTGT-3'    | 5'-CTTGCTGCGATAGTCTGAGTGTTCC-3' |
